# Supplementary material
Source: Springer Nature journal article supplement (https://www.springermedizin.de/resource/supplementary/12936_2013_2761_MOESM2_ESM.pdf/9544194)

**A****Amino acid**

|             | 35 | 211 | 250 | 335 | 376 | 380 | 418 |
|-------------|----|-----|-----|-----|-----|-----|-----|
| Sal I       | E  | H   | K   | D   | A   | I   | K   |
| Haplotype A | •  | N   | N   | Y   | T   | •   | R   |
| Haplotype B | K  | N   | N   | Y   | T   | •   | R   |
| Haplotype C | K  | N   | N   | Y   | T   | T   | R   |

**B**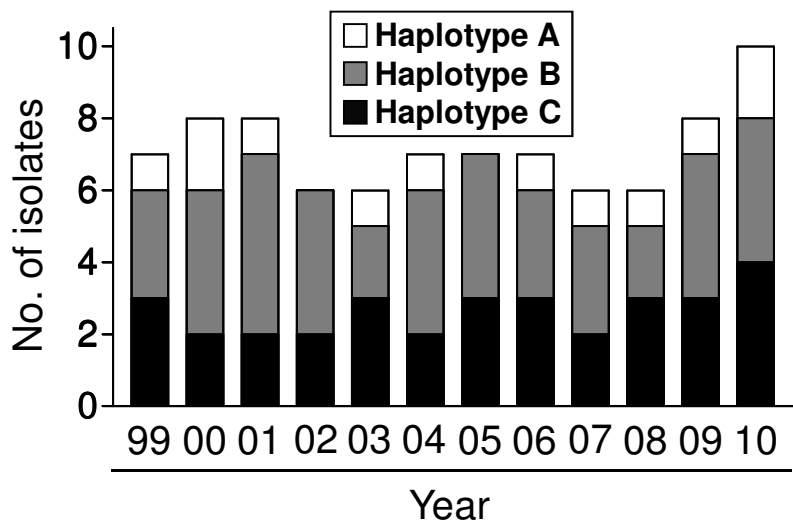

Supplement: MOESM2 [file 9544194]
